# Supplementary material for: Galactose-conjugates of the oseltamivir pharmacophore—new tools for the characterization of influenza virus neuraminidases
Source: Royal Society of Chemistry journal article supplement (doi:10.1039/b903394g), 2009-01-01
Supplement: b903394g.pdf [file b903394g.pdf]

Supporting Information

$^1\text{H}$ -,  $^{13}\text{C}$ - and  $^{31}\text{P}$ -NMR spectra

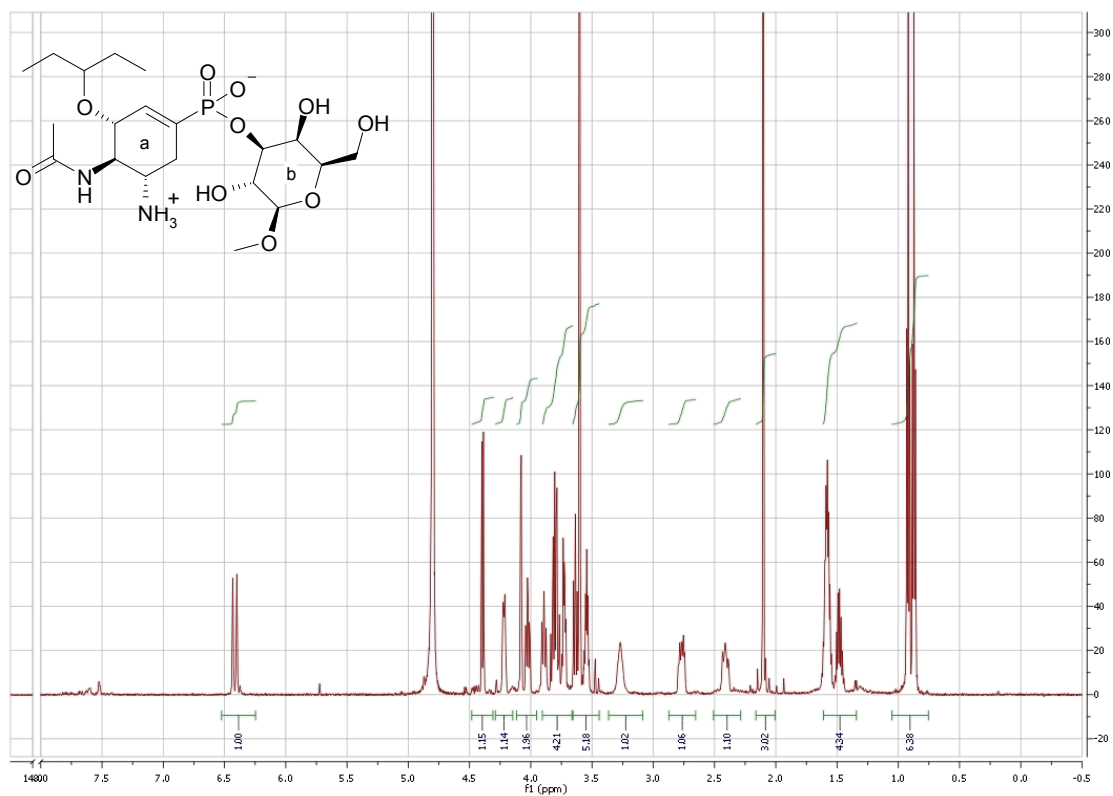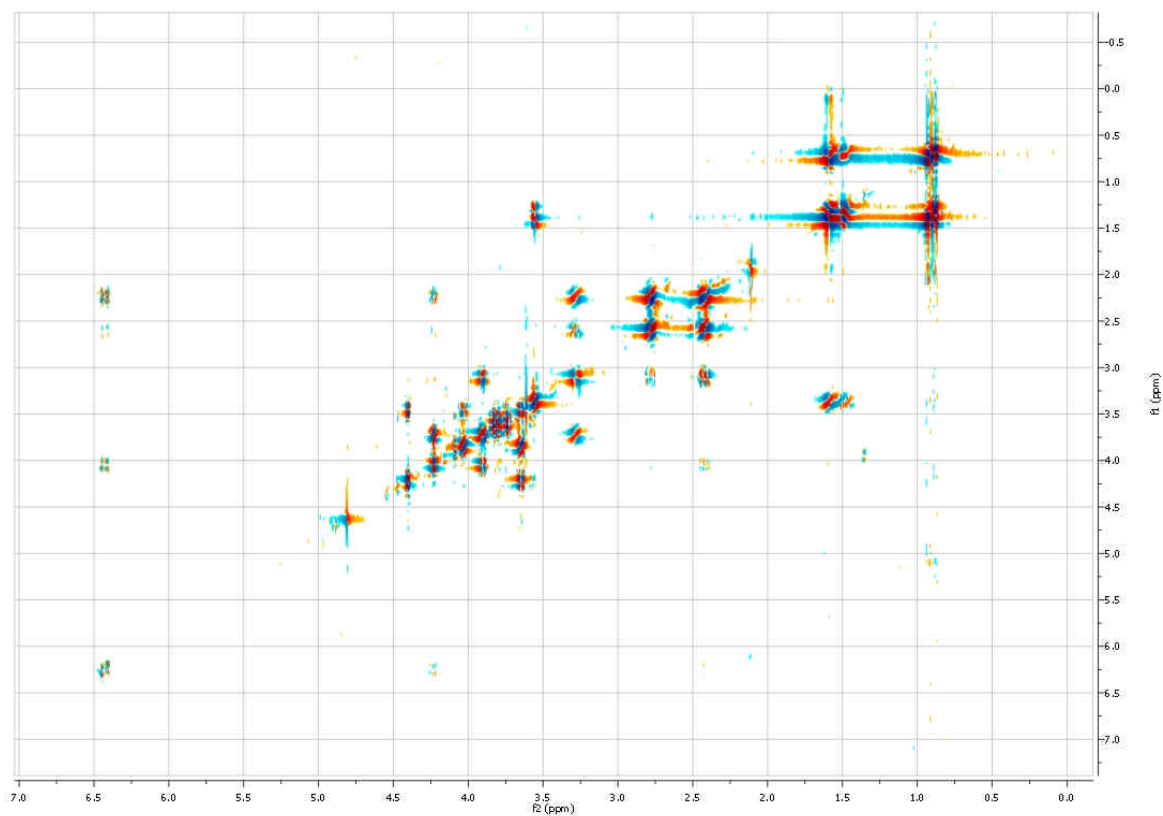

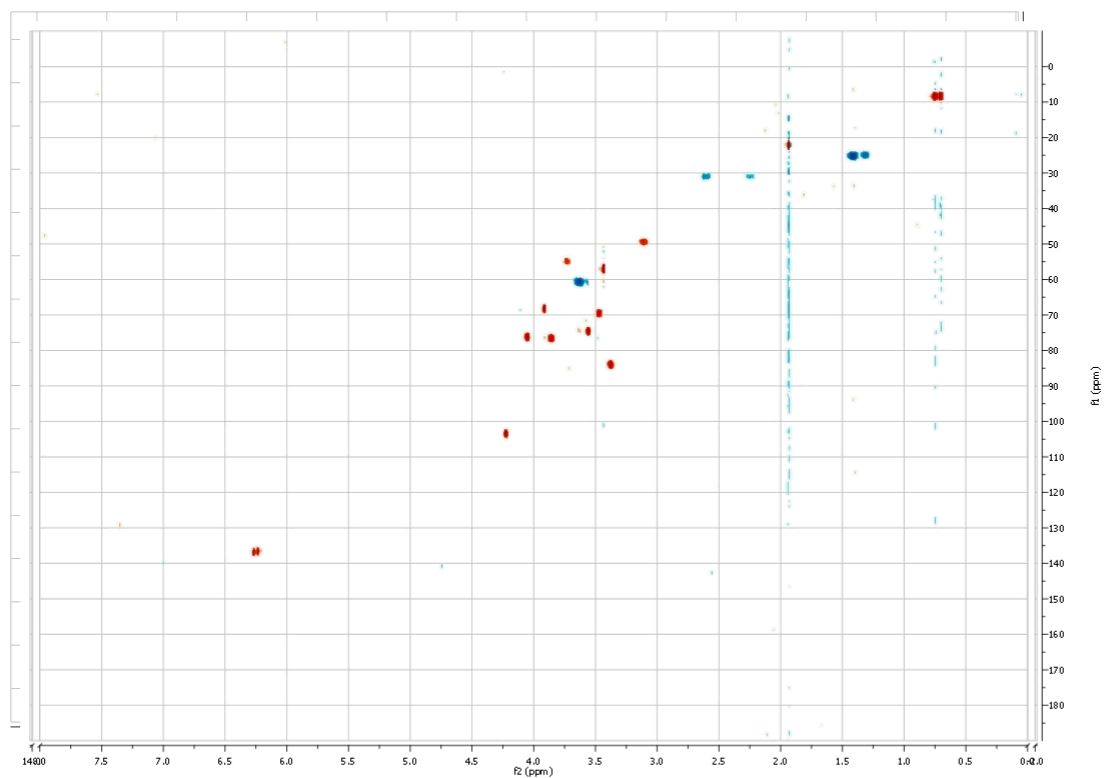

HSQC-NMR (600 MHz, D<sub>2</sub>O) of Compound 4

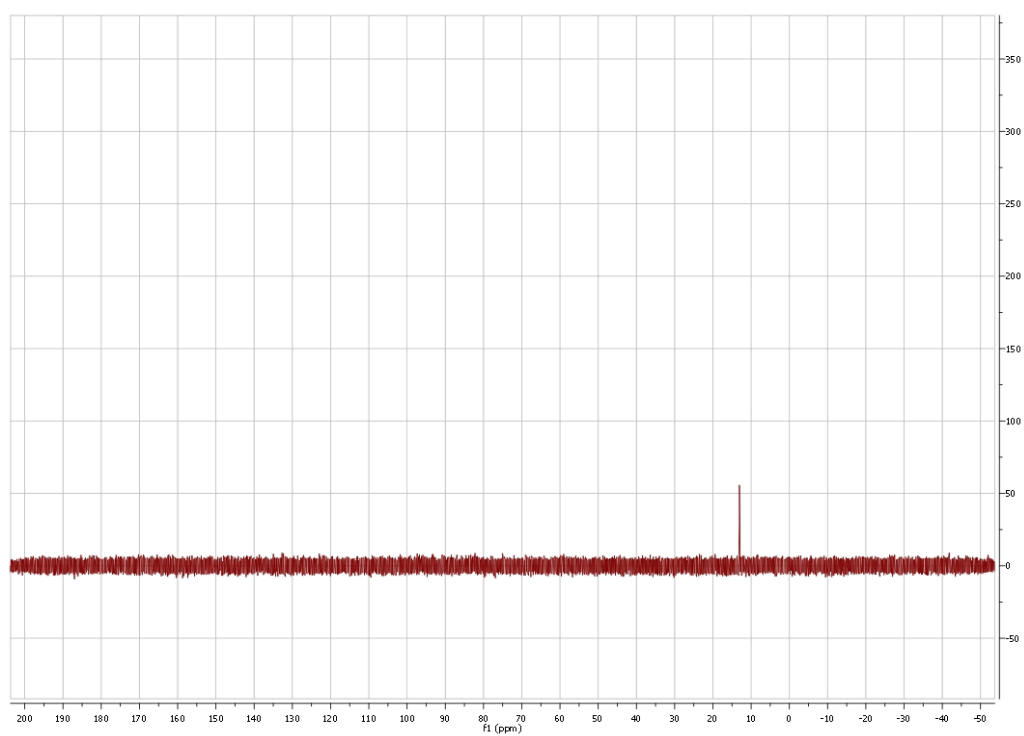

<sup>31</sup>P-NMR (242.9 MHz, D<sub>2</sub>O) of Compound 4

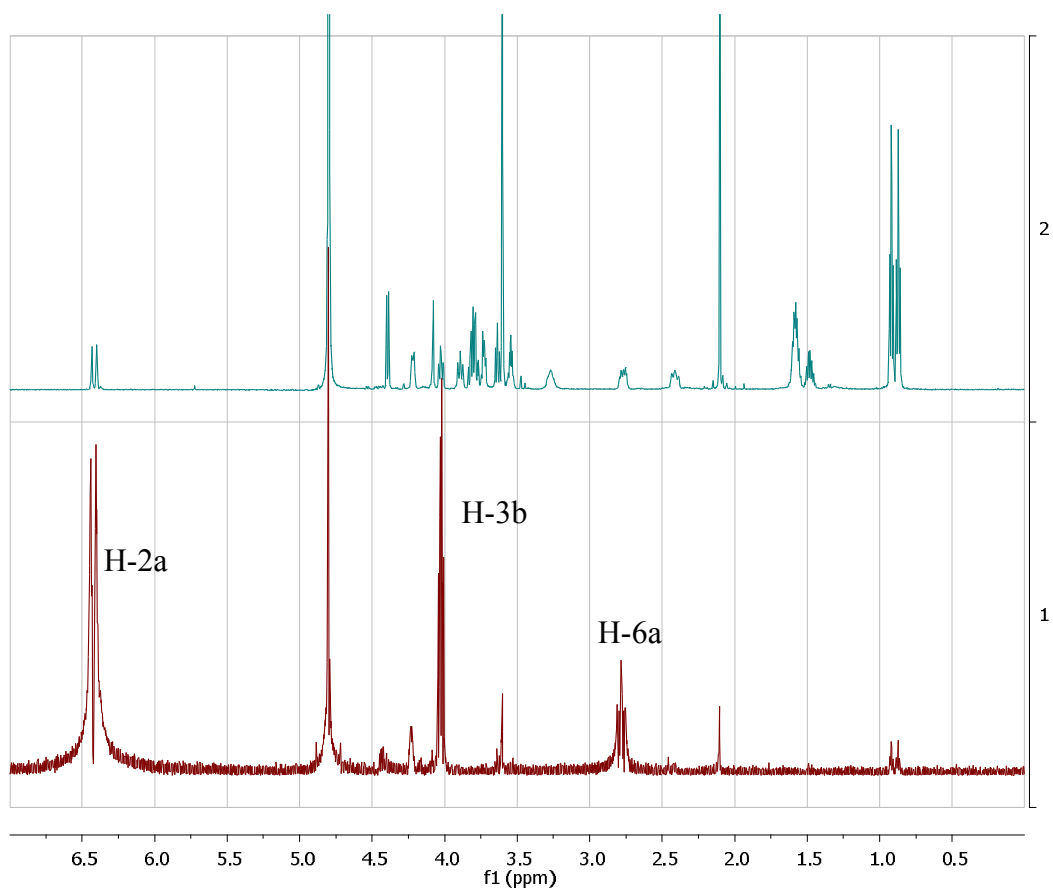

SED-NMR (600 MHz, D<sub>2</sub>O) of Compound 4

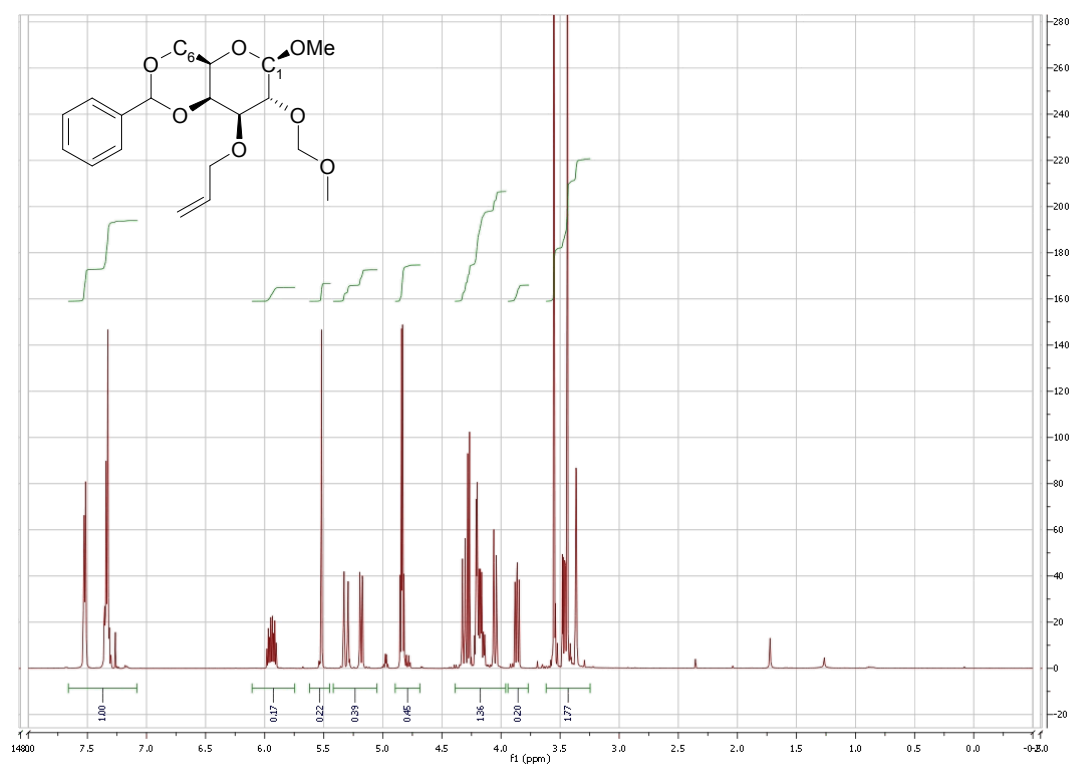

<sup>1</sup>H-NMR (500 MHz, CDCl<sub>3</sub>) of Compound 8

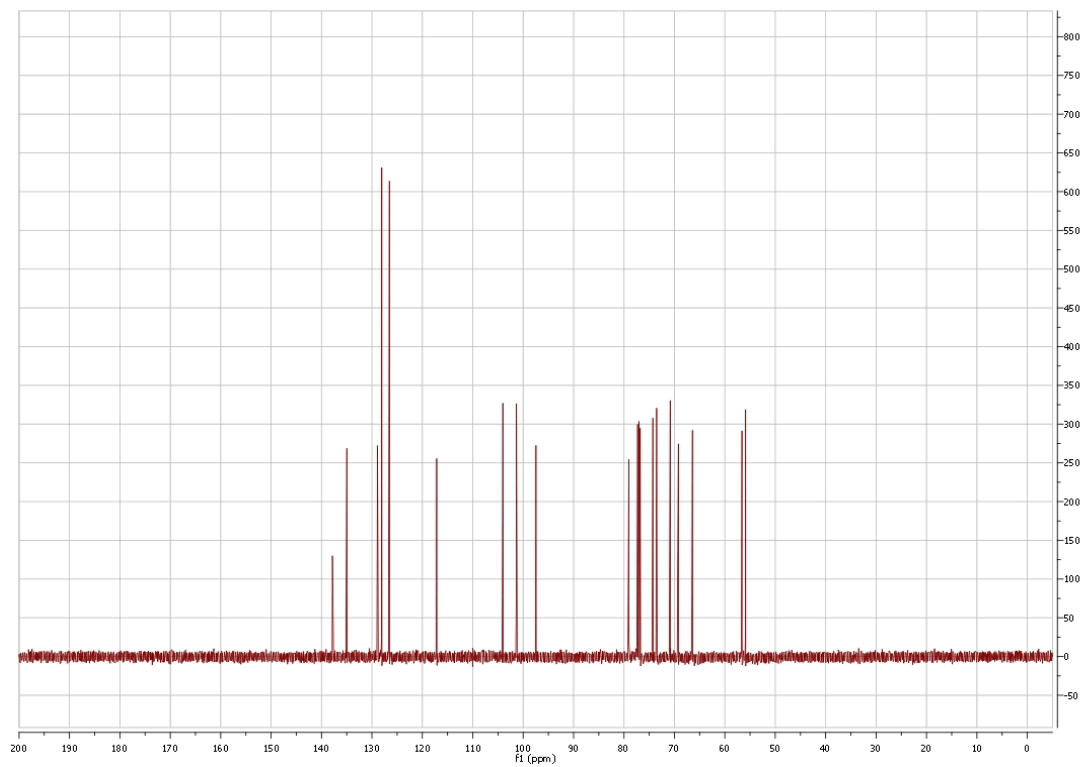

$^{13}\text{C}$ -NMR (125.8 MHz,  $\text{CDCl}_3$ ) of Compound **8**

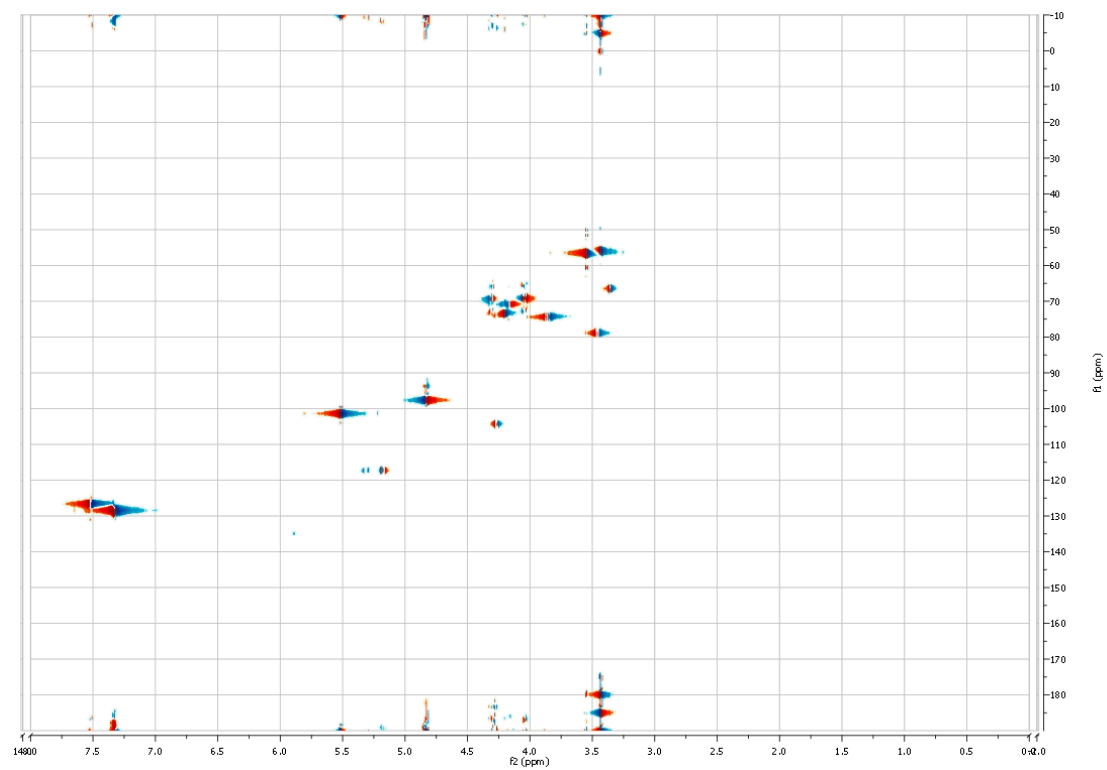

HSQC-NMR (500 MHz,  $\text{D}_2\text{O}$ ) of Compound **8**

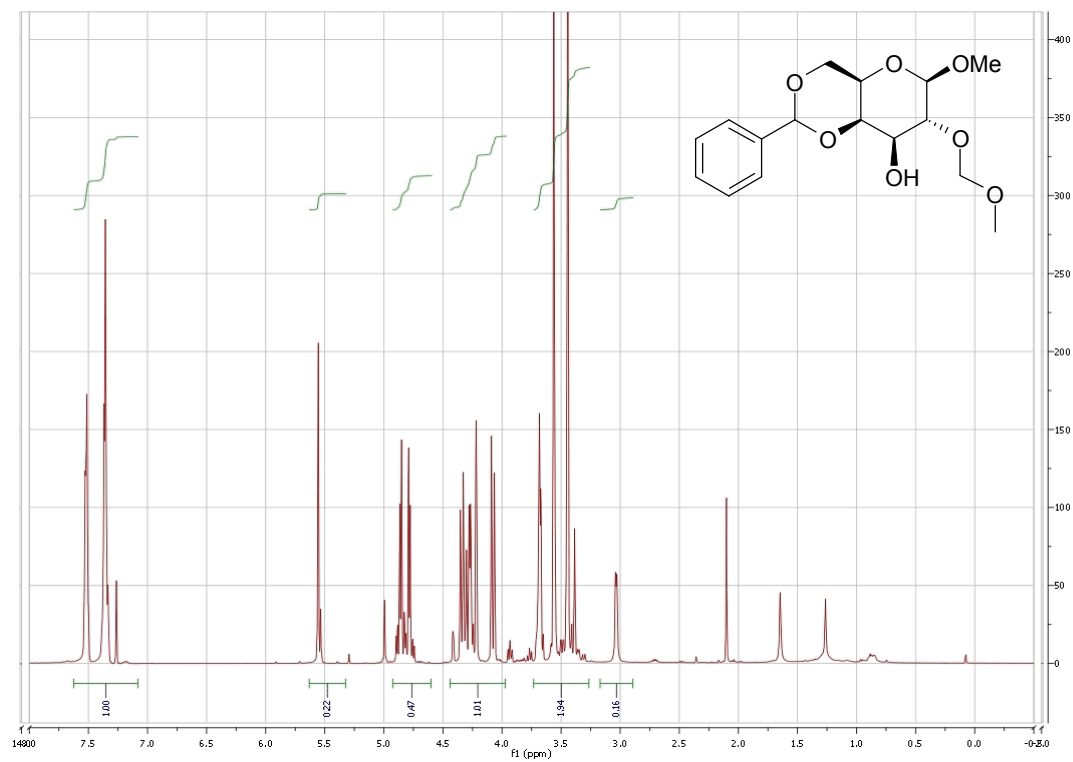

$^1\text{H-NMR}$  (500 MHz,  $\text{CDCl}_3$ ) of Compound 9

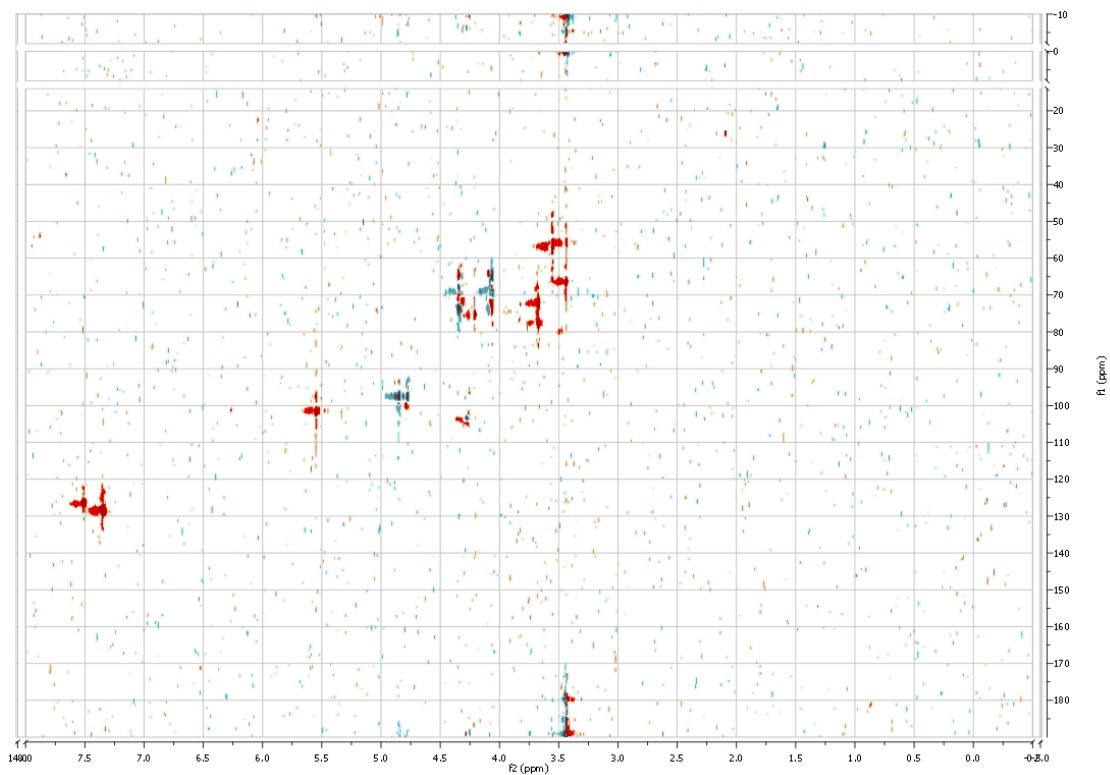

HSQC-NMR (500 MHz,  $\text{CDCl}_3$ ) of Compound 9

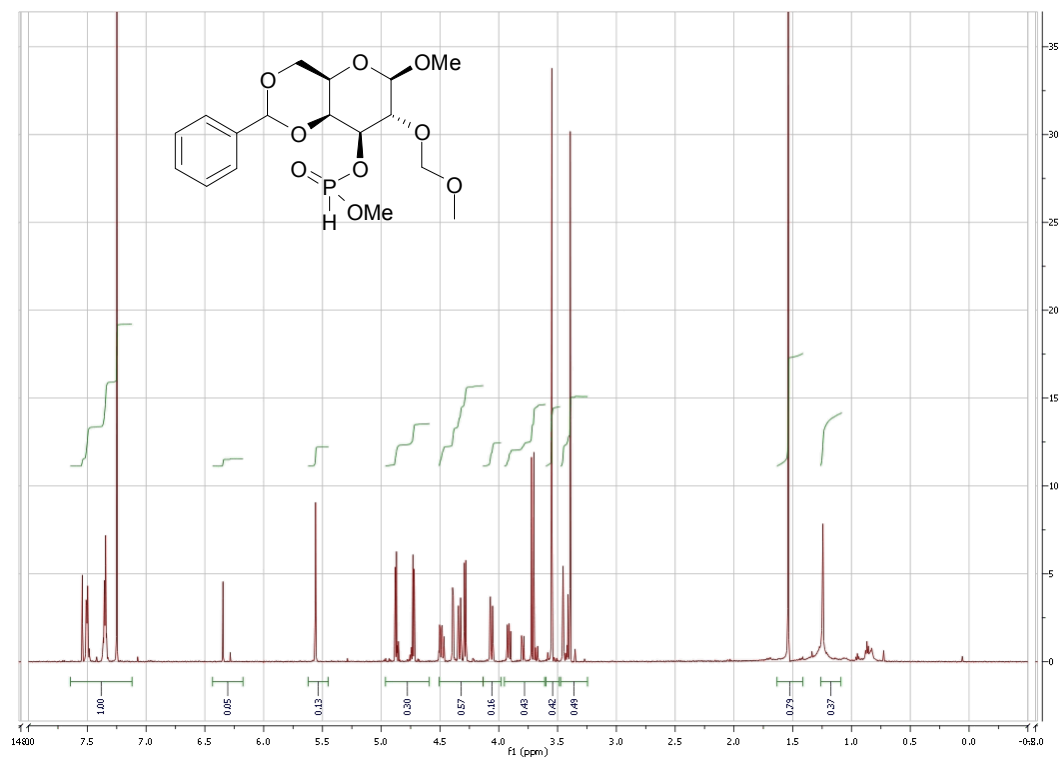

$^1\text{H-NMR}$  (500 MHz,  $\text{CDCl}_3$ ) of Compound 10

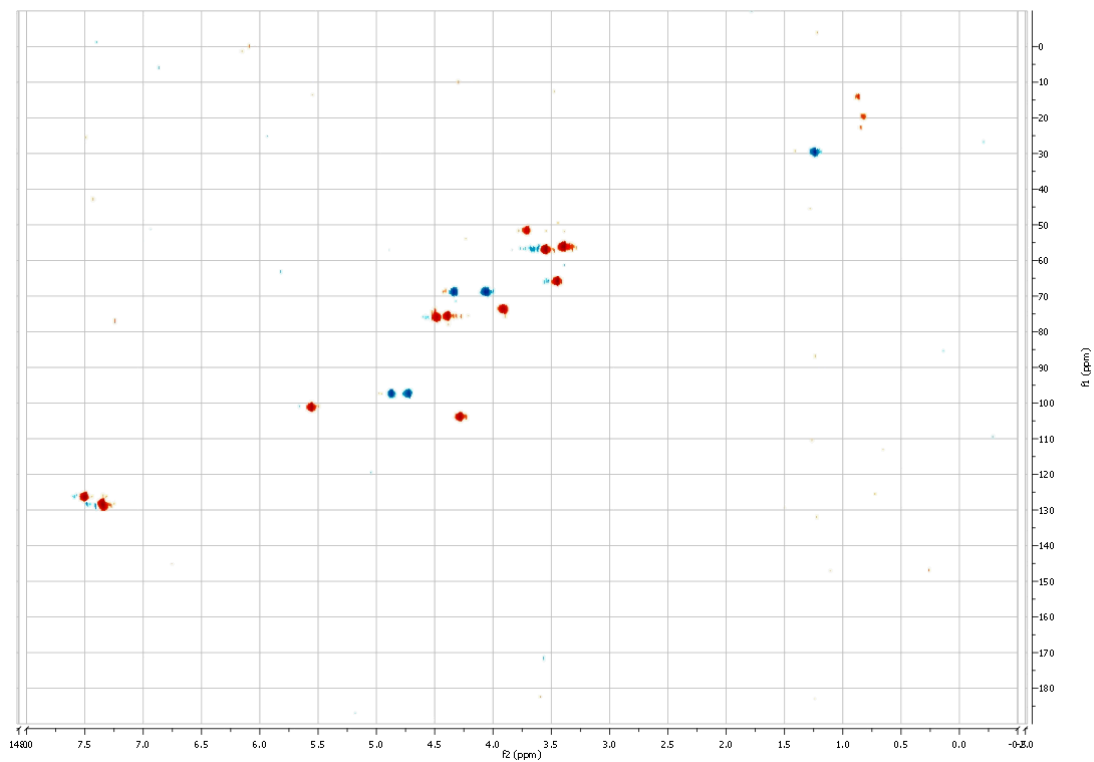

HSQC-NMR (500 MHz,  $\text{CDCl}_3$ ) of Compound 10

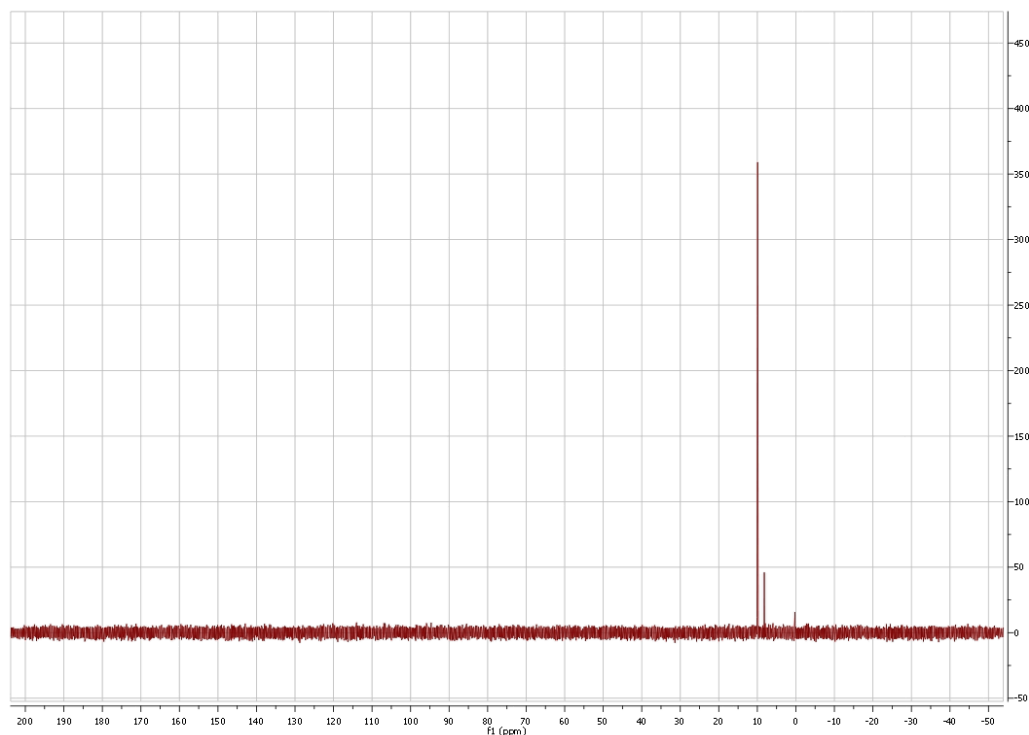

$^{31}\text{P}$ -NMR (161.9 MHz,  $\text{CDCl}_3$ ) of Compound **10**

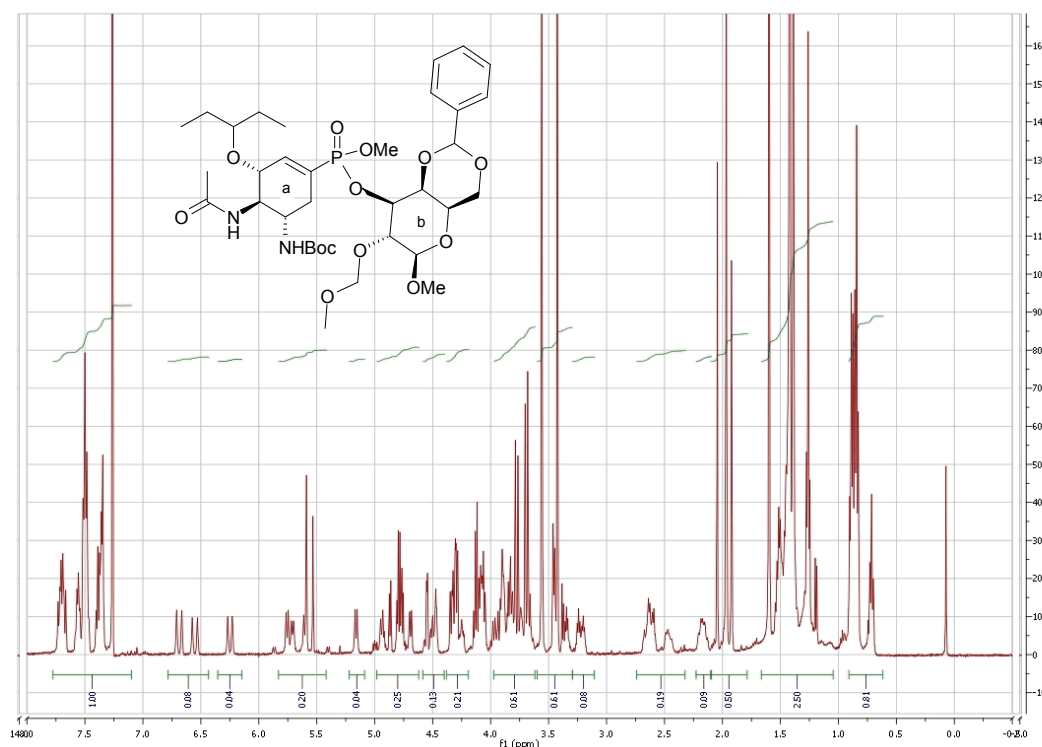

$^1\text{H}$ -NMR (500 MHz,  $\text{CDCl}_3$ ) of Compound **11**  
(mixture of diastereoisomers, containing an inseparable cyclohexenyl  
diphenylphosphine oxide impurity)

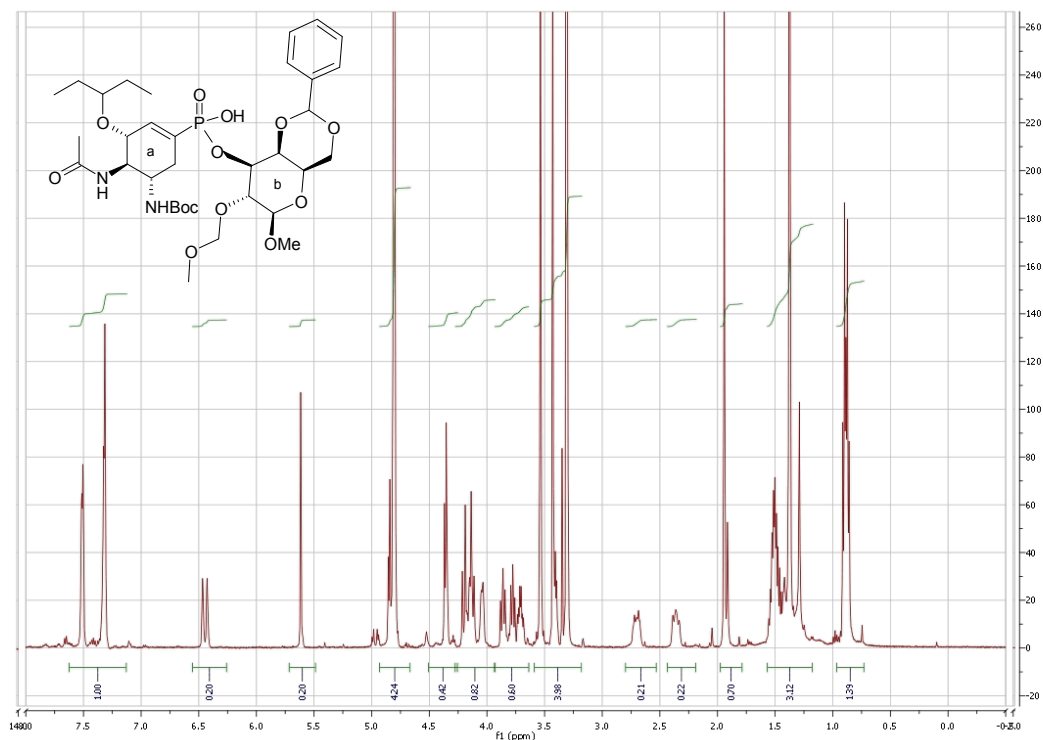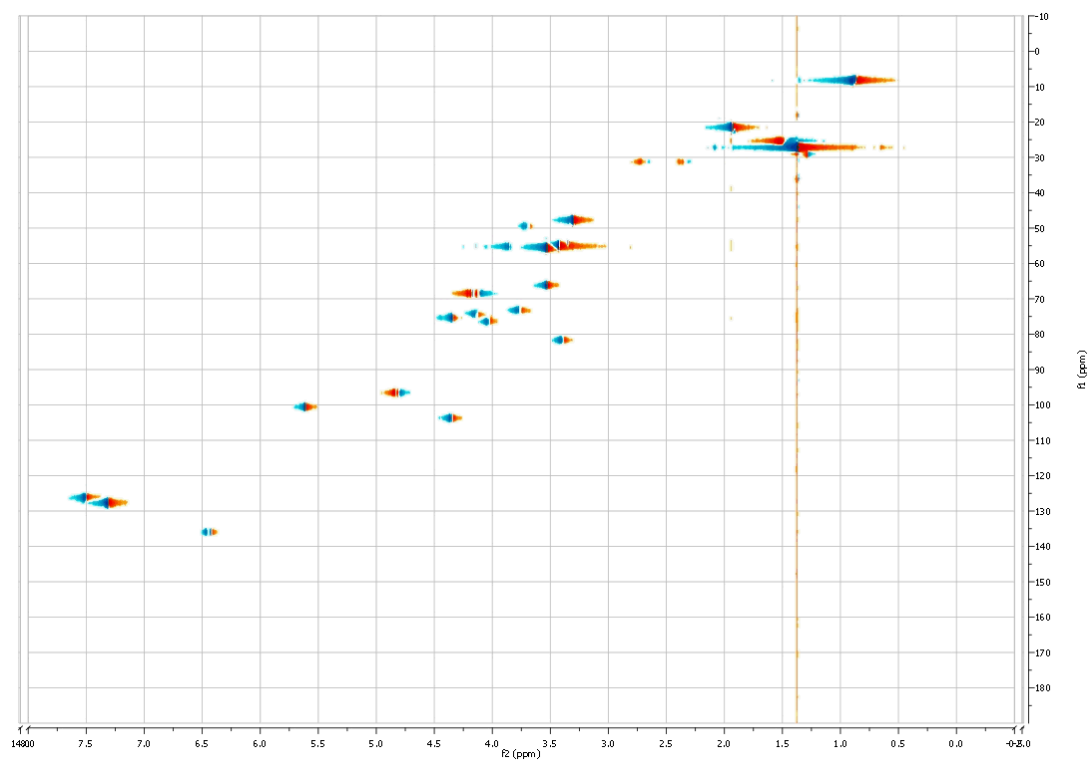



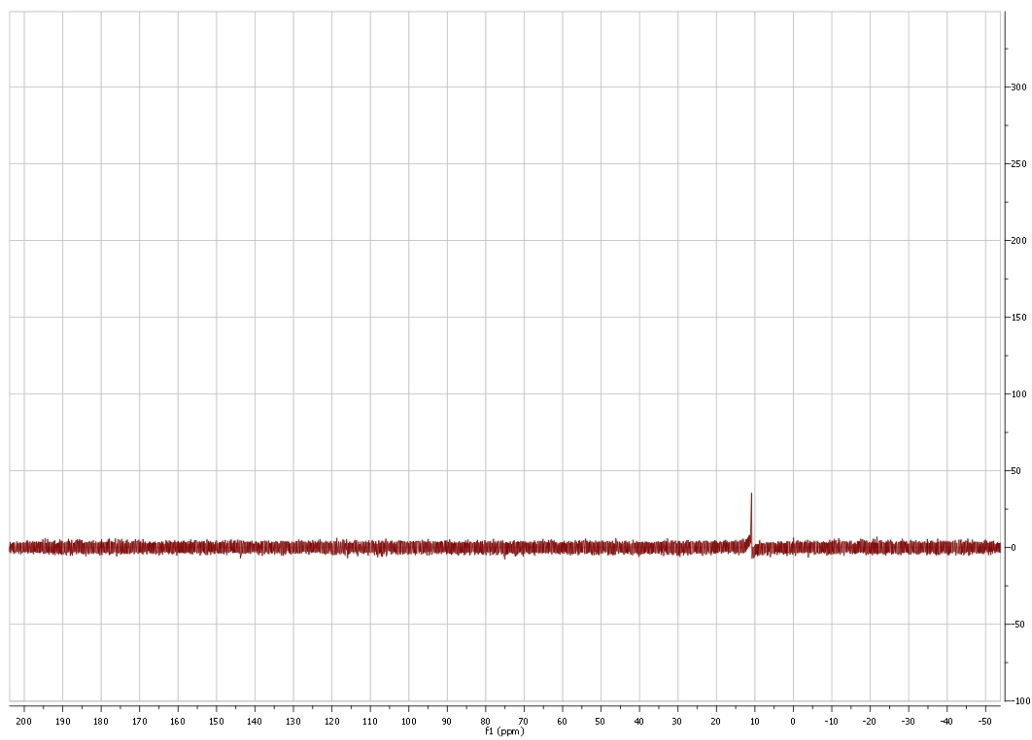

$^{31}\text{P}$ -NMR (161.9 MHz,  $\text{CD}_3\text{OD}$ ) of Compound **12**
